# Supplementary material
Source: ML conference proceedings conference paper supplement (https://openaccess.thecvf.com/content/CVPR2025/html/Zhou_HarmonySet_A_Comprehensive_CVPR_2025_paper.html)
Supplement: Supplementary file 1 [file Zhou_HarmonySet_A_Comprehensive_CVPR_2025_supplemental.pdf]

# HarmonySet: A Comprehensive Dataset for Understanding Video-Music Semantic Alignment and Temporal Synchronization

## Supplementary Material

### A. More details of HarmonySet

#### A.1. Dataset Construction pipeline

Videos in HarmonySet are sourced from the YouTube Shorts platform and were crawled using 293 keywords we designed. The complete list of keywords is shown in Figure 6.

Figure 7 illustrates the multi-phase annotation process. The raw data we crawled includes videos along with their audio and metadata. The metadata includes the title, author, duration, and video width and height, as shown in Figure 8. We used PANNs [61] for music tagging and video filtering. The music tags generated by PANNs were added to the metadata, and videos without music were filtered out based on the tagging results. The filtering criterion was: if the labels with top 2 probabilities do not include ‘music’, the video is deleted. The filtered videos were then assigned to human annotators for detailed screening to **ensure video-music pair quality** and to **exclude non-ethical and sensitive content**. The instructions for the annotators were:

**Music Check:** *If there is no background music (e.g., pure human voice, pure environmental sound, pure noise, no sound, etc. Music mixed with human voice counts as having music), please flag the video. Listen to the entire video before making this determination, as music may only be present in a portion of the video.*

**Content Suitability Check:** *Carefully review the entire video for any content that is: Non-Ethical: This includes, but is not limited to, content that promotes or depicts illegal activities, harmful behavior, or discrimination. Sensitive: This includes, but is not limited to, content that is sexually suggestive, graphically violent, or exploits, abuses, or endangers children.*

**Video Quality Check:** *Please also assess the overall video quality. Flag any videos with technical issues, such as severe distortion, extremely poor resolution, or corrupted files.*

**Human Annotation** We conducted a rigorous annotator selection process. We recruited 120 annotators to pre-annotate 500 videos. The 120 annotators are all experts who have previous formal experience in video annotation work. After the pre-annotation, we retained 25 individuals who demonstrated both accuracy, diversity, and speed in their annotations. For videos with music, human annotators were to mark key time points and label tags. In the key time point annotation, annotators first identified moments representing visual narrative turning points or key points, then determined whether the music synchronously changed with the video at those moments. The instructions were:

*Please mark up to three important time points in the video. If there are no changes throughout the video, fill in 0. Then determine: A) The music changes precisely in sync with the video at the turning point; B) The music changes near the turning point but is not strongly synchronized; C) The music does not change when the video turns. The answer format should be: video timestamp + comma + uppercase letter option, separated by semicolons between time points. Example: 00:10,A; 00:20,B; 00:30,C (Non-synchronization means the visual changes but the music remains the same. Examples of synchronized music changes include [outfit change on beat], [music changes to a victorious tune after a basketball shot], [music reaches a climax as the video reaches its most exciting moment], etc.)*

For label tagging, the structured label system is shown in Figure 9.

**Automatic Annotation** After human annotation, in the automatic annotation phase, the MLLM will receive the video and audio content, human annotation results, and required metadata as input. An example of the metadata is shown in Figure 8, where the video title and audio tags will be used in the automatic annotation process. The MLLM will generate detailed video-music alignment annotations, including semantic alignment and temporal synchronization understanding. We use Gemini 1.5 Pro as the MLLM for the automatic annotation phase, with specific instructions shown in Figure 10. In addition, to ensure the diversity of instructions and to avoid overestimation of performance, we employed multiple prompt templates for the instruction tuning data, as illustrated in Figure 11. These instructions convey the same underlying meaning while avoiding rigid patterns in sentence structure and word choice. The instructions in the dataset will be randomly assigned to one of these ten templates, promoting variability and enhancing the robustness of the training process. This not only helps in capturing a wider range of expressions but also mitigates the risk of the model becoming overly reliant on specific phrasing, thereby improving its generalization capabilities.

#### A.2. More statistics

The raw data crawled from the platform consists of 59,771 video-music pairs. After the first round of filtering, the number of video-music pairs was reduced to 49,610. Following a meticulous manual screening, the total number of videos was further reduced to 48,328. In addition to statistics including video categories, video duration, and the number of words

| Main categories   | Subclasses       | Keywords                                                                                                                                                                                                                                               |
|-------------------|------------------|--------------------------------------------------------------------------------------------------------------------------------------------------------------------------------------------------------------------------------------------------------|
| Life & Emotion    | Family           | childcare, familytime, familyfun, toddler, Babysitting, Preschool, Babycare, FamilyActivities, Parenting                                                                                                                                               |
|                   | Relationships    | lovestory, relationship, romance, dating, Lovejourney, Partnership, Courtship, couple, engagement                                                                                                                                                      |
|                   | Friendship       | friendsforever, Bestfriends, ForeverFriends                                                                                                                                                                                                            |
|                   | Social           | Routine, Moments, Highlights, Challenge, Funfact, Social                                                                                                                                                                                               |
|                   | Memories         | throwback, Nostalgia, Flashback, Flashbacks, Memories                                                                                                                                                                                                  |
|                   | Emotion          | emotions, feelings, sentiments, passion, emotional, Mood                                                                                                                                                                                               |
|                   | Cooking          | baking, recipes, foodie, cuisine, Cookingrecipes, HomeBaking, FoodLover, CookingIdeas, FoodCulture, Gourmet, Gastronomy, cooking                                                                                                                       |
|                   | Pets             | petlovers, AnimalLovers, PetCare, FurryFriends, pets                                                                                                                                                                                                   |
| Art & Shows       | Vlogs            | dailyvlog, DailyLife, vloglife, TravelVlog                                                                                                                                                                                                             |
|                   | Art              | 3DArt, illustration, art, graffiti                                                                                                                                                                                                                     |
|                   | Photography      | streetphotography, portrait, photoshoot, photography, snapshots                                                                                                                                                                                        |
|                   | Sculpture        | sculpture                                                                                                                                                                                                                                              |
|                   | Movie            | movie                                                                                                                                                                                                                                                  |
|                   | Programs         | Programs, shows, performances                                                                                                                                                                                                                          |
|                   | Dance            | LatinDance, HipHopDance, MusicalTheatre, ballet, hiphop, streetdance, choreography, latin, Dance                                                                                                                                                       |
|                   | Magic            | illusion, trick, MagicTrick, MagicShow, magic                                                                                                                                                                                                          |
| Travel & Events   | Theatre          | theatre, MusicalTheatre                                                                                                                                                                                                                                |
|                   | Music            | instrumentals, Popmusic, BluesMusic, JazzMusic, electronicmusic, livemusic, guitar, piano, songwriter, rock, vocals, musical, jazz, pop, blues, melody, melodies, Concerts, Keyboard, Rockmusic, LiveShow, Showcase, melody, melodies, Music, Acoustic |
|                   | Scenery          | Scenery, vista                                                                                                                                                                                                                                         |
|                   | Nature           | wildlife, nationalparks, NatureParks, naturesounds, NaturePhotography                                                                                                                                                                                  |
|                   | Travel           | Sightseeing, Travelbug, Roadtrips, roadtrip, wanderlust, tourist, exploration, CityTour, destination, TravelVlog, backpacking                                                                                                                          |
|                   | CulturalHeritage | cultural relevance, HistoricalHeritage, heritage, CulturalHeritage                                                                                                                                                                                     |
|                   | Themepark        | amusementpark, Funfair, themepark                                                                                                                                                                                                                      |
|                   | Celebrations     | Xmas, CNY, FestiveSeason, Carnival, holidayseason, valentinesday, chinesenewyear, christmas, mothersday, fathersday, Celebrations, honeymoon, anniversary                                                                                              |
| Sports & Outdoors | Festivals        | Festival, festivals                                                                                                                                                                                                                                    |
|                   | Fitness          | FitnessTips, WorkoutPlan, gymtime, training, cardio, bodybuilding, strength, meditation, Fitness                                                                                                                                                       |
|                   | Sports           | WinterSports, SnowSports, Golfing, Diving, swimming, martialarts, athletics, tennis, golf, gym, workout, yoga, hiking, skiing, basketball, soccer, football, Crossfit, Sports                                                                          |
|                   | Competitions     | Competition, Competitions                                                                                                                                                                                                                              |
|                   | Wildlife         | Wildlife                                                                                                                                                                                                                                               |
| Tech & Fashion    | Outdoors         | Outdoors, Countryside                                                                                                                                                                                                                                  |
|                   | Technology       | TechUpdates, TechNews, TechLife, Technology, innovation, TechTrends                                                                                                                                                                                    |
|                   | Gadgets          | Gadgets, TechGadgets, TechReviews                                                                                                                                                                                                                      |
|                   | Vehicles         | automobile, carlovers, CarReviews, CarEnthusiasts, CarCulture, racing, car, Vehicles                                                                                                                                                                   |
|                   | Fashion          | attire, ensemble, Lookbook, Trends, FashionShow, fashiontrends, trendy, Fashion                                                                                                                                                                        |
| Knowledge         | Style            | style, outfit, accessories                                                                                                                                                                                                                             |
|                   | Makeup           | MakeupLooks, cosmetics, beauty, beautyhacks, BeautyTips, Skincare, Makeup, BeautySecrets                                                                                                                                                               |
|                   | Howto            | howto, howtomake, Howto                                                                                                                                                                                                                                |
|                   | Tutorial         | Tutorial, courses, teaching                                                                                                                                                                                                                            |
|                   | Productivity     | Productivity, selfimproving                                                                                                                                                                                                                            |
|                   | Lifehacks        | lifehacks, tipsandtricks, Hacks, LifeTips                                                                                                                                                                                                              |
|                   | DIY              | DIY, homedecor, Homemade                                                                                                                                                                                                                               |
|                   | History          | History, legacy                                                                                                                                                                                                                                        |
|                   | Economy          | finance, Investment, FinancialAdvice, FinancialGoals, business, Economy                                                                                                                                                                                |

Figure 6. We employed a hierarchical keyword taxonomy for video collection, comprising six primary categories and 43 subcategories, yielding a total of 293 unique keywords. This taxonomy was meticulously designed to target videos with high-quality music. Keywords unrelated to music, such as *news broadcast* and *read*, were excluded to enhance the precision of the search and prioritize music-centric content. The resulting keyword set was then utilized to crawl and curate a collection of videos.

in the annotation text shown in Figure 2, we also compiled statistics on the frequency of music tags and keywords in video titles (with meaningless stop words like *I* and *the* removed). Figure 12 presents word clouds for music tags and video titles, illustrating the diversity in music genres, styles, and instruments, as well as the variety of content and themes showcased in the videos.

### A.3. Benchmark

#### Metrics of HarmonySet-OE

Traditional language metrics are mainly sensitive to lexical variations and cannot identify changes in sentence semantics.

**BLEU-4** BLEU [62], or Bilingual Evaluation Understudy, is a metric for evaluating machine translation by comparing N-grams of the translation to human references. BLEU-4 specifically evaluates the match of four-word sequences and

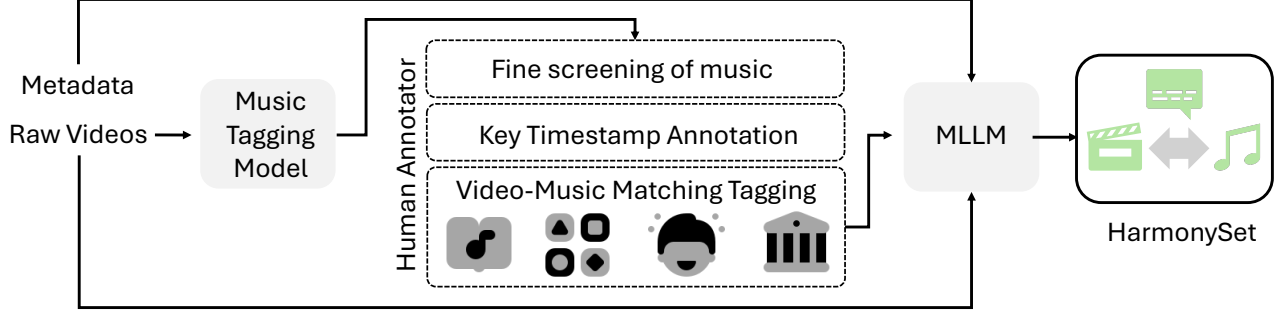

Figure 7. Multi-phase annotation process

```
{
  "title": "Do you know what kind of pets they are? #pets #animals #shorts",
  "author": "Sweetheart Zoo",
  "duration": 54,
  "video_height": 640,
  "video_width": 360,
  "audio_labels": [ "Music", "Speech", "Hip hop music", "Rapping", "Boing",
    "Singing", "Rhythm and blues", "Music for children", "Plop", "Zing" ]
}
```

Figure 8. An example of metadata of video-audio pairs. The top 10 most probable music labels generated by the PANNs are retained. Metadata used in the automated annotation generation pipeline includes video titles and music tags.

includes a Brevity Penalty to account for shorter translations. **ROUGE-L** ROUGE [63], or Recall-Oriented Understudy for Gisting Evaluation, measures the overlap between generated and reference summaries. ROUGE-L focuses on the Longest Common Subsequence (LCS), which does not require consecutive word matches.

**BLEURT** BLEURT [72], or Bilingual Evaluation Understudy with Representations from Transformers, evaluates machine translation and natural language generation using pre-trained language models like BERT. It captures deep semantic information, addressing issues like synonym substitution and sentence rearrangement better than traditional metrics.

**CIDEr** CIDEr [73], or Consensus-based Image Description Evaluation, is designed for image captioning tasks. It uses TF-IDF weights to emphasize n-grams common in human annotations but rare in general descriptions, capturing more detailed information.

**WUPS** The Wu-Palmer similarity (WUPS) [74] measures the similarity of word senses based on their positions in the WordNet taxonomy. However, it struggles with words that are similar in form but different in meaning and cannot handle phrases or sentences effectively.

These traditional Natural Language Generation metrics lack the ability to understand and evaluate text with complex logic. In contrast, large language models are proven to be capable of comprehending text deeply. We employed GPT-4o to evaluate similarity between model responses and ground

truth annotations in terms of their semantic meaning or the true intent they express. Specific prompt can be seen in Figure 13.

**HarmonySet-MC Curation** We followed the QA curation pipeline of widely used multiple-choice QA benchmarks like EgoSchema [10] and VideoMME [13] to design the extended benchmark HarmonySet-MC. We used a large language model to generate three incorrect answers for each annotation that is used as the correct answer. After iterating through multiple prompt versions, we ensured that the final multiple-choice questions were challenging yet reasonable, avoiding any form-based biases beyond semantics. Detailed prompt can be seen in Figure 14. For the LLM selection, we tested GPT4o, Claude, and GPT4, ultimately choosing GPT4o as the model for generating the multiple-choice questions.

## B. More details of Experiment

### B.1. Baseline Introduction

Our open-source model baselines include VideoLLaMA2 [23] and Video-SALMONN [24], both state-of-the-art video-audio multimodal large language models. Earlier MLLMs capable of processing both video and audio, such as Macaw-LLM [26], are no longer available due to a lack of maintenance and therefore were not included in our experiments.

**Video-LLaMA2** VideoLLaMA2 is a Video Large Language Model designed for spatial-temporal modeling and audio understanding. VideoLLaMA2 comprises a vision-language branch, an audio-language branch, a Spatial-Temporal Convolution Connector (STC Connector), and a Large Language Model (LLM). The vision-language branch uses a CLIP image encoder (ViT-L/14) to process individual frames, then aggregates these features using a novel Spatial-Temporal Convolution Connector (STC Connector) designed to preserve spatial-temporal information efficiently. The audio-language branch transforms audio into spectrograms, encodes them using BEATs, and then uses an MLP to align the audio features with the LLM. The chosen LLMs for this

|                          |                      |                  |                      |            |             |                    |          |      |          |       |       |     |
|--------------------------|----------------------|------------------|----------------------|------------|-------------|--------------------|----------|------|----------|-------|-------|-----|
| Rhythm & Synchronization | Music pace           | fast             | slow                 | medium     | diverse     |                    |          |      |          |       |       |     |
|                          | Rhythm alignment     | precise          | appropriate          | irrelevant | mismatch    |                    |          |      |          |       |       |     |
| Theme & Content          | Content alignment    | strongly related | indirectly related   | unrelated  | conflicting |                    |          |      |          |       |       |     |
|                          | Narrative supplement | suggestion       | enhancement          | reversing  | independent | no supplement      |          |      |          |       |       |     |
| Emotion                  | Video Emotions       | happy            | sad                  | angry      | fear        | anxious            | creative | hope | surprise | humor | relax | ... |
|                          | Emotion alignment    | consistent       | partially consistent | contrast   | imbalanced  | unrelated          |          |      |          |       |       |     |
|                          | Emotional richness   | rich             | single               | abrupt     |             |                    |          |      |          |       |       |     |
| Culture                  | Culture elements     | clothing         | customs              | cuisines   | landmarks   | no culture element |          |      |          |       |       |     |
|                          | Cultural relevance   | related          | misuse               | unrelated  |             |                    |          |      |          |       |       |     |

Figure 9. A hierarchical labeling system is employed for manual annotation, encompassing four primary aspects: Rhythm and Synchronization, Theme and Content, Emotion, and Culture. These aspects are further refined into nine sub-aspects, with labels representing factual information or degrees of match.

architecture are Mistral-Instruct and Qwen2-Instruct. The STC Connector prioritizes maintaining spatial-temporal order, minimizing token count, and mitigating information loss during downsampling through the use of 3D downsampling and RegStage convolution blocks.

**Video-SALMONN** Video-SALMONN is designed for obtaining fine-grained temporal information required by speech understanding. Video-SALMONN uses pre-trained encoders for visual (InstructBLIP), speech (Whisper), and non-speech audio (BEATs) inputs. These features are temporally synchronized, aligning audio and visual features at the video frame rate (2Hz). A Multi-Resolution Causal (MRC) Q-Former then processes these synchronized features at different time scales (e.g., 1, 5, and 10-second windows) to capture fine-grained audio-visual joint representations.

## B.2. Implementation Details

For VideoLLaMA2 training, we utilized 4 NVIDIA H800 GPUs (a total of 32 GPUs). The training configuration followed the default settings of VideoLLaMA2-AV, except for the learning rate (lr), which was adjusted to 1e-5. The model was trained for 2 epochs on our dataset. All testing was conducted on a single NVIDIA H800 GPU (a total of 8 GPUs). Experiments in Table 2 used 16 frames for testing. For experiments in Table 10, which explore the impact of varying frame numbers, the number of frames used for testing matched the number of frames used during training (16/32/64 frames).

## B.3. More analysis of main results

In Table 2, we present scores for each model across six main video categories and four evaluation aspects. A horizontal comparison across the six video categories reveals that models generally score lowest on knowledge-based videos and highest on arts and performance videos. This may be because knowledge-based videos often require deeper semantic understanding and factual recall. The criteria for evaluating knowledge-based videos might be more stringent, reflecting the need for accurate information retrieval. On the other hand, the evaluation of arts and performance videos could be more subjective and open to interpretation, potentially leading to higher scores. A vertical comparison across the four evaluation aspects shows that all models consistently score lowest on the cultural aspect, suggesting that understanding and evaluating cultural nuances remains a significant challenge for current models. This could be due to the inherent complexity and subjectivity of cultural interpretations, and the current models lack sufficient training data that adequately represents the diversity and depth of cultural contexts. This deficiency hinders their ability to accurately assess culturally relevant aspects of the videos.

While Gemini-1.5 Pro generally performs well, the HarmonySet-enhanced VideoLLaMA2 demonstrates that open-source models can achieve comparable or even superior performance. This highlights the potential of open-source development in the MLLM domain. However, the base VideoLLaMA2 and video-SALMONN lag signifi-

# Gemini Prompt for Automated Annotation Generation

Analyze the provided video and music, developing a preliminary interpretation by generating the most fitting description for each of the following four aspects: Rhythm and Synchronization, Theme and Content, Emotion, and Cultural Relevance.

- **Rhythm and Synchronization:** Analyze how well the music's tempo (fast or slow) matches the video's pace, the level of synchronization between the music's rhythm and the video's actions or cuts, and the overall rhythmic coherence between the two.
- **Theme and Content:** Analyze how well the music's theme complements the video's content, whether the music enhances the video's narrative or message, and if there is any thematic dissonance between the two.
- **Emotion:** Analyze how well the music's style and the video's emotional tone match, identify the specific emotions conveyed by both the music (e.g., joyful, melancholic, suspenseful) and the video, assess the level of emotional coherence between them, and consider whether the music elevates the emotional impact of the video.
- **Cultural Relevance:** Analyze whether the music and video share any common cultural elements, assess the relevance and accuracy of the cultural elements used, and identify any specific geographical references in both the music and video and how well they align.

Focus your analysis on the detailed reason of match or mismatch between the video and the music for each aspect. Describe elements of both the video and the music and explain why you believe they match or mismatch.

Alongside this video and music, You will be provided with manually labeled tags representing the ground truth. Use these tags to refine and enhance your initial interpretations. Specifically, integrate the timestamps indicated in the `sync_answer.value` tag into your analysis of Rhythm and Synchronization, explaining how these synchronized (or unsynchronized) moments shape your overall understanding of the video and music's rhythmic relationship. The labels offer detailed insights, including the `sync_answer.value` tag which specifies key video timestamps and their corresponding musical synchronization. Within this tag, 'A' denotes precise synchronization between video transitions and musical changes; 'B' indicates a musical change near the transition point, but without strong synchronization; and 'C' signifies no musical change during the video transition. 0 means no key timestamps.

You will also be provided with the video's metadata including title and music tags. Use this metadata to supplement and support your interpretation. Music tags are only used for reference, and latter tags in the ten tags are generally not associated with music. It cannot be assumed that tag necessarily represents musically related content.

Finally, articulate your comprehensive and nuanced interpretation in your own words, without explicitly mentioning the labels themselves. Ensure your interpretation accurately and thoroughly reflects the information conveyed by the labels.

For each aspect, provide a rich and detailed explanation, exploring the nuances and subtleties you observe, always focusing on the interplay and degree of alignment between the visual and auditory elements. You can include your own opinion to fulfill your answer.

The output format should be:

Rhythm and Synchronization: <your detailed explanation>  
 Theme and Content: <your detailed explanation>  
 Emotion: <your detailed explanation>  
 Cultural Relevance: <your detailed explanation>

Figure 10. Prompt for generating automated annotation using Gemini 1.5 Pro. Inputs include video and audio content, manual annotated labels, and metadata. The model is tasked with providing a detailed understanding of the match across four aspects.

cantly, indicating that further research and development are needed to close the gap with closed-source models without relying on additional datasets like HarmonySet.

#### B.4. Experiments on General Audio-Visual Tasks

Table 7 presents the performance of VideoLLaMA2 on AVSD dataset before and after training with HarmonySet. AVSD is a widely used dataset for audio-visual question answering. It includes general audio-visual QA tasks,

Table 7. Performance on AVSD for General Audio-Visual QA.

| Metrics                  | BLEU        | BLEU-4      | ROUGE       | BERT        |
|--------------------------|-------------|-------------|-------------|-------------|
| VideoLLaMA2              | 0.28        | 0.19        | 0.33        | 0.87        |
| VideoLLaMA2 (HarmonySet) | <b>0.30</b> | <b>0.21</b> | <b>0.35</b> | <b>0.89</b> |

such as "Do you hear any audio at all?" and "Is there a violin sound in the background of the video?" From the table, it is evident that the VideoLLaMA2 trained with HarmonySet has achieved improved performance across all metrics. This indicates that HarmonySet not only enhances the model's understanding of the relationships between

#### # Diversified Instructions

"<video>\nExamine the given video and soundtrack, assessing their alignment in four critical areas: rhythm and timing, thematic elements, emotional resonance, and cultural significance. Offer a detailed analysis for each dimension, using specific timestamps to highlight how moments of synchronization (or lack thereof) enhance the overall effectiveness of the audio-visual experience.",

"<video>\nEvaluate the supplied video and music, focusing on their compatibility in four essential aspects: rhythm and coordination, thematic relevance, emotional effect, and cultural importance. Provide an in-depth explanation for each category, referencing specific timestamps to demonstrate how instances of synchronization (or their absence) influence the overall impact of the combined audio-visual presentation.",

"<video>\nAssess the provided video alongside the music, analyzing their compatibility across four main dimensions: rhythm and alignment, thematic substance, emotional influence, and cultural context. Deliver a thorough explanation for each aspect, incorporating specific timestamps to illustrate how moments of synchronization (or their lack) contribute to the overall effectiveness of the audio-visual experience.",

"<video>\nAnalyze the video and accompanying music, evaluating their compatibility in four key areas: rhythm and harmony, thematic expression, emotional depth, and cultural relevance. Provide a comprehensive breakdown for each dimension, using specific timestamps to show how moments of synchronization (or their absence) affect the overall effectiveness of the audio-visual experience.",

"<video>\nInvestigate the provided video and its music, assessing their compatibility across four fundamental dimensions: rhythm and synchronization, thematic content, emotional impact, and cultural significance. Offer a detailed analysis for each aspect, referencing specific timestamps to illustrate how moments of synchronization (or their lack) enhance the overall effectiveness of the combined audio-visual experience.",

"<video>\nReview the given video and soundtrack, focusing on their compatibility in four critical areas: rhythm and synchronization, thematic elements, emotional resonance, and cultural relevance. Provide a thorough explanation for each dimension, incorporating specific timestamps to highlight how moments of synchronization (or their absence) contribute to the overall effectiveness of the audio-visual experience.",

"<video>\nCritique the provided video and music, evaluating their compatibility across four key dimensions: rhythm and timing, thematic content, emotional impact, and cultural significance. Deliver a comprehensive analysis for each aspect, using specific timestamps to illustrate how moments of synchronization (or their absence) influence the overall effectiveness of the audio-visual experience.",

"<video>\nExplore the relationship between the provided video and music, assessing their compatibility in four main areas: rhythm and synchronization, thematic relevance, emotional effect, and cultural importance. Provide an in-depth explanation for each dimension, referencing specific timestamps to demonstrate how moments of synchronization (or their lack) affect the overall impact of the audio-visual presentation.",

"<video>\nAnalyze the video and its accompanying music, evaluating their compatibility across four essential dimensions: rhythm and coordination, thematic substance, emotional influence, and cultural context. Offer a detailed breakdown for each aspect, incorporating specific timestamps to illustrate how moments of synchronization (or their absence) contribute to the overall effectiveness of the audio-visual experience.",

"<video>\nExamine the provided video and music, focusing on their compatibility in four critical areas: rhythm and alignment, thematic expression, emotional depth, and cultural relevance. Provide a comprehensive explanation for each dimension, using specific timestamps to show how moments of synchronization (or their lack) enhance the overall effectiveness of the combined audio-visual experience.",

"<video>\nAnalyze the provided video and music, evaluating their compatibility across four key dimensions: rhythm and synchronization, thematic content, emotional impact, and cultural relevance. Provide a comprehensive explanation for each aspect, incorporating specific timestamps to illustrate how moments of synchronization (or their absence) contribute to the overall effectiveness of the combined audio-visual experience."

Figure 11. Diversified instructions for HarmonySet data

video and music but also proves beneficial for conventional tasks, such as perception. We will further investigate the specific insights and capabilities that HarmonySet can provide, aiming to deepen our understanding of its impact on model performance and its potential applications in various audio-visual tasks.

## B.5. More details of ablations

**Full ablation on different training data** Table 9 shows the results of VideoLLaMA2 when not trained, trained with 10k MLLM auto-generated data, trained with 10k HarmonySet data, and trained with the entire HarmonySet data. It provides a more intuitive comparison on different types of training data, demonstrating the effectiveness and importance of incorporating human knowledge through HarmonySet.



# GPT Prompt for HarmonySet-MC Curation

Please design multiple-choice questions based on the following subtitles in four aspects: Rhythm and Synchronization, Theme and Content, Emotion, and Cultural Relevance. For each aspect, use the given subtitles as the correct option, and design three other options that are similar but have some errors. The correct options should contain all information that the subtitles provide.

Note that the correct option can slightly modify the language of the subtitles but should not change the meaning. Each option should have similar length. Especially in the rhythm section, where the correct option may contain a timestamp, the confusingly wrong option may also contain some incorrect timestamp or incorrect description of the correct timestamp to avoid the correct answer being too obvious.

Ensure that the incorrect options are distinguishable from the correct option but not too simple or completely unrelated. Also, provide the correct answer's letter (A, B, C, or D) randomly positioned among the options. The correct answer should only include the letter without any other words.

Provided subtitles:\n\n

The output format should be:

Rhythm and Synchronization:

A.<one option>

B.<one option>

C.<one option>

D.<one option>

Correct Answer: <The correct choice such as 'B'>

Theme and Content:

A.<one option>

B.<one option>

C.<one option>

D.<one option>

Correct Answer: <The correct choice such as 'A'>

Emotion:

A.<one option>

B.<one option>

C.<one option>

D.<one option>

Correct Answer: <The correct choice such as 'C'>

Cultural Relevance:

A.<one option>

B.<one option>

C.<one option>

D.<one option>

Correct Answer: <The correct choice such as 'D'>

Figure 14. Detailed prompt for generating HarmonySet-MC using GPT4o based on HarmonySet annotations. Each question includes one correct option derived from the dataset and three distractor options designed to be similar in structure, length, and theme, but containing identifiable factual errors.

collected answers from three different annotators per question. Human-generated answers were evaluated using the same methodology applied to the models. We compared human performance against VideoLLaMA2 (HarmonySet), the best-performing model in our main experiment. Results show a noticeable gap between even the best model's performance and human performance, highlighting the limitations of current models in generating open-ended responses. However, the performance gap between humans and models on the OE task is smaller (e.g., in the cultural aspect, the human score is 6.32, while the model score is 4.77) compared to the multiple-choice task (e.g., human accuracy on the cul-

tural aspect is 93.81%, while the best model accuracy is only 50.40%). This smaller gap in open-ended responses might be attributed to the higher cost for humans to produce long-form text, whereas models can achieve higher scores by increasing text richness and length. This suggests that the OE task presents certain challenges even for humans.

Table 9. Full ablation on impact of different training data. Results reveal that training with 10,000 automatically generated annotations provides minimal performance improvement and even hinders performance on Theme and Emotion aspects, suggesting potential inaccuracies or misleading information in the auto-generated data. In contrast, training with HarmonySet data consistently enhances performance, with greater improvements observed with larger training sets. This demonstrates the effectiveness and importance of incorporating human knowledge through HarmonySet.

| Models                         | Metrics | Life & Emotion | Art & Performance | Travel & Events | Sports & Outdoors | Knowledge | Tech & Fashion | Overall     |
|--------------------------------|---------|----------------|-------------------|-----------------|-------------------|-----------|----------------|-------------|
| VideoLLaMA2 (Vanilla)          | R & S   | 3.89           | 4.80              | 4.56            | 4.01              | 3.39      | 3.54           | 4.15        |
|                                | T       | 4.09           | 4.83              | 4.93            | 3.89              | 3.44      | 3.71           | 4.29        |
|                                | E       | 4.36           | 5.01              | 5.02            | 4.08              | 3.44      | 3.49           | 4.38        |
|                                | C       | 2.95           | 3.46              | 3.69            | 2.56              | 2.32      | 2.52           | 3.05        |
| VideoLLaMA2 (10k, F.A.)        | R & S   | 4.56           | 5.05              | 4.97            | 4.28              | 4.20      | 4.17           | 4.59        |
|                                | T       | 4.20           | 5.01              | 4.85            | 3.49              | 3.36      | 3.41           | 4.16        |
|                                | E       | 4.29           | 4.76              | 4.67            | 4.03              | 3.76      | 3.79           | 4.28        |
|                                | C       | 3.53           | 3.98              | 3.67            | 2.93              | 3.13      | 3.02           | 3.44        |
| VideoLLaMA2 (10k, HamrmonySet) | R & S   | 4.69           | 5.58              | 5.30            | 4.49              | 4.36      | 4.25           | 4.86        |
|                                | T       | 4.66           | 5.02              | 4.98            | 4.40              | 4.39      | 4.29           | 4.70        |
|                                | E       | 4.64           | 5.43              | 5.26            | 4.06              | 3.85      | 3.78           | 4.66        |
|                                | C       | 3.99           | 4.30              | 4.25            | 2.97              | 3.79      | 3.34           | 3.89        |
| VideoLLaMA2 (Full HamrmonySet) | R & S   | 5.43           | 6.35              | 6.03            | 4.94              | 5.33      | 4.83           | <b>5.55</b> |
|                                | T       | 5.12           | 5.21              | 5.03            | 4.84              | 5.21      | 4.85           | <b>5.06</b> |
|                                | E       | 5.25           | 6.41              | 5.84            | 4.00              | 4.88      | 4.47           | <b>5.26</b> |
|                                | C       | 4.87           | 4.98              | 4.72            | 3.31              | 5.23      | 4.09           | <b>4.62</b> |

Table 10. Table 6 records the average results across six types of videos. This table presents the detailed results of the frame number ablation experiments. Experiments using VideoLLaMA2 trained with varying numbers of video frames (16, 32, and 64) show optimal performance with 32 frames. Performance degrades with 64 frames, indicating that using too many frames may lead to information redundancy and performance degradation.

| Models    | Metrics | Life & Emotion | Art & Performance | Travel & Events | Sports & Outdoors | Knowledge | Tech & Fashion | Overall     |
|-----------|---------|----------------|-------------------|-----------------|-------------------|-----------|----------------|-------------|
| 16 Frames | R & S   | 5.43           | 6.35              | 6.03            | 4.94              | 5.33      | 4.83           | 5.55        |
|           | T       | 5.12           | 5.21              | 5.03            | 4.84              | 5.21      | 4.85           | 5.06        |
|           | E       | 5.25           | 6.41              | 5.84            | 4.00              | 4.88      | 4.47           | 5.26        |
|           | C       | 4.87           | 4.98              | 4.72            | 3.31              | 5.23      | 4.09           | 4.62        |
| 32 Frames | R & S   | 5.47           | 6.37              | 6.07            | 4.98              | 5.39      | 4.87           | <b>5.59</b> |
|           | T       | 5.14           | 5.23              | 5.08            | 4.85              | 5.23      | 4.86           | <b>5.08</b> |
|           | E       | 5.26           | 6.44              | 5.88            | 4.05              | 4.90      | 4.50           | <b>5.29</b> |
|           | C       | 4.89           | 5.01              | 4.76            | 3.32              | 5.26      | 4.14           | <b>4.65</b> |
| 64 Frames | R & S   | 5.38           | 6.31              | 5.97            | 4.86              | 5.27      | 4.76           | 5.49        |
|           | T       | 5.03           | 5.11              | 4.88            | 4.72              | 5.10      | 4.71           | 4.94        |
|           | E       | 5.22           | 6.36              | 5.80            | 3.95              | 4.82      | 4.40           | 5.21        |
|           | C       | 4.76           | 4.89              | 4.68            | 3.22              | 5.10      | 4.02           | 4.53        |
